# Supplementary material
Source: publisher figshare collection journal article supplement (https://sage.figshare.com/ndownloader/files/17947709)

Figure 1 FTIR spectrum of PFOA, PFOA methy ester and reaction products of PFOA with tetrabutylammonium hydroxide and DMF-DMA

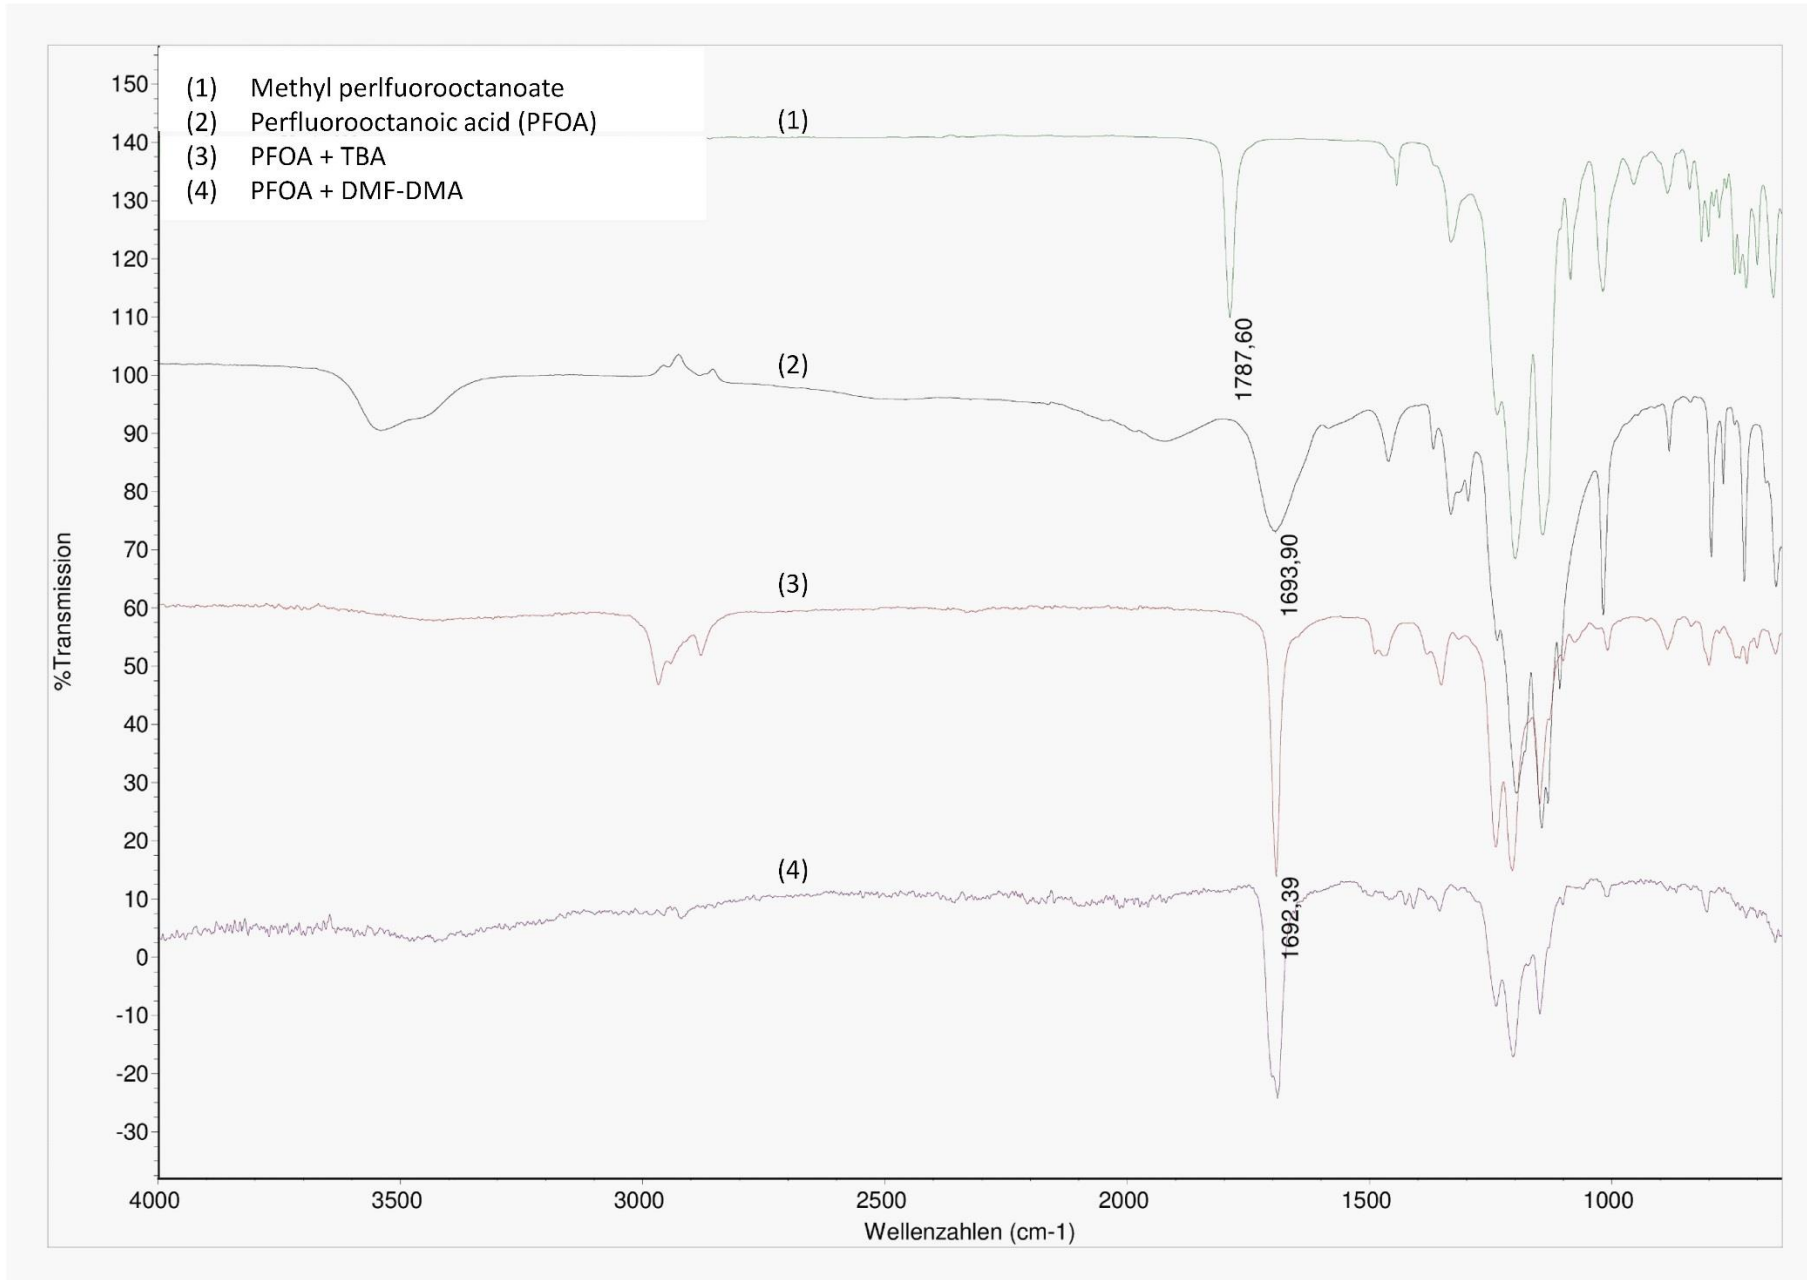

Supplement: Supplementary file 1 [file 17947709]
